# Supplementary material for: Policies and opportunities for physical activity engagement in Austrian schools: a census survey
Source: PeerJ. 2024 Aug 13;12:e17794. doi: 10.7717/peerj.17794 (PMC11328834; doi:10.7717/peerj.17794)
Supplement: Supplemental Information 1 [file peerj-12-17794-s001.xlsx]

## Sheet: Tabelle1
participants	type of school	number of students	environment	teachers´education	duration of longest break	cancellation of PE classes	participation in PE lessons	gymnastic hall	number of hymnastic halls	size of gsymnastic hall	swimming hall	school yard	meadow area	playground	table tennis	athletics facility	gym	climbing wall	beachvolley court	skate park	sports field	basketball hoops	satisfaction with PA facilities	fitness tests	participation in sports events	cooperation with sports clubs	PA promotion projects	extracurricular PA programs	satisfaction with activity friendliness	wish for professional support in PA promotion
1	2	190	1	1	20	1	5	1	2	600	2	2	1	2	1	1	2	2	2	2	1	2	3	2	2	2	2		3	1
2	2	170	2	1	45	1	5	1	2	125	2	1	1	1	1	1	2	2	2	2	1	1	4	1	1	2	2	1	4	1
3	2	127	2	2	25	1	5	1	2	275	1	1	1	1	1	1	2	2	2	2	1	1	3	2	1	2	2	1	3	1
4	2	153	2	2	15	1	5	1	1	200	2	2	1	2	2	2	2	2	2	2	2	2	2	2	2	2	2	1	2	1
5	2	36	1	3	20	1	4	4			2	2	2	1	1	2	2	2	2	1	1	2	2	2	2	2	2	2	3	1
6	1	86	2	1	20	1	5	1	1	120	2	1	1	1	1	2	2	2	2	2	2	1	3	2	2	1	1	2	4	1
7	1	130	1	1	20	1	5	1	1	140	1	1	1	1	2	1	2	1	1	2	1	2	2	2	2	1	2	2	3	1
8	2	176	2	2	20	1	5	1	2	200	2	1	1	1	1	1	2	2	1	2	1	1	3	2	2	2	2	1	3	1
9	1	121	2	1	15	1	5	1	2	400	2	1	1	1	2	1	2	1	2	2	1	1	2	1	1	1	1	2	3	1
10	2	202	2	2	15	1	5	1	3	288	2	1	1	2	1	1	2	1	1	2	1	1	3	1	2	2	2	1	3	1
11	2	184	2	1	15	1	1	1	1	250	2	2	1	2	1	2	2	1	1	1	1	2	3	2	1	1	1	1	3	1
12	2	181	2	2	20	1	5	1	2	480	1	1	1	1	1	1	2	2	1	2	1	1	4	2	1	1	2	1	4	1
13	1	106	1	1	15	1	5	1	1	200	2	1	1	1	1	1	2	2	2	2	1	1	3	1	2	1	1	1	4	1
14	1	270	1	2	20	1	5	1	2	150	2	1	1	1	1	2	2	2	2	2	2	2	4	1	1	1	1	2	4	1
15	1	132	1	1	15	1	5	1		120	2	1	1	1	2	2	2	2	2	2	2	2	3	1	1	1	1	1	3	1
16	1	291	1	2	15	1	5	1	1	300	2	2	1	1	2	2	2	2	2	2	2	2	3	2	2	1	1	2	3	1
17	2	242	2	2	15	1	5	1	2	200	1	1	1	2	2	1	2	2	2	2	1	2	4	2	1	1	2	1	3	1
18	1	287	1	1	20	1	1	1	1	502	2	1	1	1	1	2	2	2	2	2	1	2	3	1	2	1	1	1	4	1
19	3	1294	1	1	15	1	5	1	3	500	2	2	1	2	1	2	2	2	2	2	1	2	3	2	1	2	2	1	3	1
20	3	450	2	1	15	1	5	1	3	550	2	1	1	2	2	1	2	2	2	2	1	1	4	2	1	1	2	1	3	1
21	4	100	2	1	15	4	4	1	3	550	2	1	1	2	2	1	2	2	2	2	1	1	4	2	1	2	2	2	3	1
22	1	106	2	2	20	1	5	1	2	120	2	1	1	1	2	2	2	1	2	2	1	2	3	2	1	2	2	2	4	1
23	1	127	2	1	20	1	5	1	1	120	1	1	1	1	2	2	2	2	2	2	1	1	2	1	1	1	2	2	4	1
24	1	109	2	1	25	1	5	1	1	100	1	1	1	1	1	1	2	2	2	2	1	2	3	2	1	1	1	1	4	1
25	1	105	2	1	20	1	5	1	1	180	2	1	1	2	2	2	2	2	2	2	2	2	4	2	2	2	1	2	4	1
26	3	586	2	1	10	1	5	3	3	410	1	1	1	2	1	2	2	2	1	2	1	2	4	2	1	2	2	1	4	1
27	2	140	2	2	20	1	5	1	2	400	2	1	1	2	2	1	2	2	2	2	2	2	3	1	1	2	2	1	3	1
28	1	91	2	1	15	1	5	1	1	300	2	1	1	1	1	2	2	1	2	1	1	1	3	2	2	1	1	2	3	1
29	2	230	2	1	15	1	5	1	2	280	1	1	1	1	1	1	2	1	1	2	1	2	3	2	1	1	2	1	4	1
30	1	179	1	1	25	1	5	1	2	210	1	1	1	1	2	2	2	1	1	1	1	2	3	2	2	2	1	2	4	1
31	3	1200	1	1	15	1	5	2	3	1250	1	1	1	2	1	1	2	1	1	1	2	1	4	2	1	2	2	1	2	1
32	4	450	2	1	60	6	5	2	1	120	2	3	2	2	1	2	2	1	2	2	2	2	3	2	1	2	2	1	3	1
33	1	59	1	2	20	1	5	1	1	150	2	1	1	1	2	2	2	2	2	2	1	2	3	2	2	2	1	2	4	1
34	4	320	1	1	10	1	4	1	3	150	2	1	1	1	1	1	2	2	1	2	1	1	3	1	1	1	2	1	3	1
35	2	137	2	2	10	1	5	1	2	400	2	1	1	2	1	2	2	2	2	2	2	2	3	2	2	2	2	1	3	1
36	1	12	2	1	20	1	5	3	1	100	1	1	1	1	1	1	2	1	2	2	1	1	3	2	2	2	1	2	3	1
37	1	82	2	1	15	1	5	1	1	250	1	1	1	2	2	1	2	2	2	2	1	2	3	2	1	1	1	1	4	1
38	2	300	1	1	15	1	5	1	3	300	2	1	1	1	1	1	1	1	2	2	1	2	4	2	1	2	2	1	3	1
39	1	70	2	1	20	1	5	1	1	50	1	1	1	1	1	1	2	2	2	2	1	2	4	2	2	1	1	2	4	1
40	1	36	2	1	20	1	5	1	1	100	2	1	1	2	2	1	2	2	2	2	1	1	3	2	2	2	2	2	4	1
41	1	43	2	1	15	1	5	1	1	120	2	1	1	1	1	2	2	2	2	2	1	1	3	2	1	2	2	2	4	2
42	1	55	2	1	15	1	5	1	1	175	2	2	1	1	2	1	2	1	2	1	1	2	4	2	2	2	1	2	4	1
43	4	450	1	1	15	1	4	1	2	600	1	3	1	2	2	1	2	1	1	2	1	1	2	2	1	2	2	1	2	1
44	1	62	2	1	25	1	5	1	1	100	2	1	1	1	1	2	2	2	2	2	1	2	4	2	1	1	2	2	4	1
45	4		1	1	500	2	5	1	2		1	1	1	2	1	2	1	2	1	2	1	2	1
46	1	143	2	1	15	1	5	1	2	120	1	1	1	1	1	1	2	1	1	2	1	2	4	1	1	1	1	1	4	2
47	2	69	1	2	40	6	5	3	1	150	1	1	1	1	1	2	2	2	2	2	1	2	2	2	2	2	2	1	2	1
48	1	62	2	1	30	1	5	1	1	288	2	1	1	1	2	2	2	2	2	2	1	2	3	2	1	1	2	2	4	1
49	1	248	1	1	20	1	5	1	2	150	2	1	1	1	2	2	2	2	1	2	1	1	4	1	1	1	1	1	4	1
50	1	65	1	1	15	1	5	1	1	200	2	1	1	1	2	2	2	2	2	2	2	2	2	2	2	1	1	1	2	1
51	1	78	1	2	35	1	5	3	2	200	2	1	1	1	2	2	2	2	2	2	2	1	3	2	2	1	2	1	3	1
52	4	360	2	1	15	1	5	1	2	120	1	3	1	2	2	1	2	2	1	2	1	1	3	2	1	2	2	1	3	1
53	1	200	1	2	15	1	5	1	2	200	2	2	1	2	2	2	2	2	2	2	1	2	2	2	1	1	1	1	3	1
54	4	377	2	1	50	1	4	3	1	200	1	1	1	2	2	1	2	2	1	2	1	2	4	2	1	2	2	2	3	2
55	1	183	1	1	20	1	2	1	1	120	2	1	1	1	2	2	2	2	2	2	2	2	3	2	1	1	2	1	4	1
56	4	120	2	1	10	2	3	3	2	500	2	1	1	1	1	2	1	2	1	2	1	1	2	2	1	1	2	1	3	1
57	1	35	2	1	20	1	5	1	1	180	1	1	1	1	1	2	2	2	2	2	1	2	1	2	1	2	1	1	4	1
58	1	50	2	1	20	1	5	1	1	120	2	1	1	1	2	2	2	2	2	2	1	1	3	2	1	1	1	2	4	1
59	1	11	1	2	30	1	5	4			1	2	1	2	2	2	2	2	2	2	2	2	2	2	2	2	2	2	2	1
60	2	100	2	1	15	1	4	1	3	280	1	1	1	1	1	2	2	1	1	2	1	1	3	2	1	1	1	1	4	1
61	1	77	2	1	20	1	5	1	1	140	2	1	1	1	2	2	2	2	2	2	2	2	4	2	1	1	2	2	4	1
62	1	107	2	1	15	1	5	1	1	200	1	1	1	1	2	2	2	1	2	2	1	2	1	2	1	1	1	1	4	2
63	1	55	2	1	20	1	5	1	1	180	2	1	1	1	2	2	2	2	2	2	2	1	4	2	2	2	1	2	4	1
64	2	130	2	2	20	1	5	1	2	400	1	1	1	1	2	2	2	2	2	2	1	2	1	1	2	2	1	2	4	1
65	2	300	1	2	15	1	5	1	2	900	1	2	1	1	1	1	2	2	1	2	1	2	4	1	1	1	1	1	4	1
66	1	86	2	1	15	1	5	1	1	250	2	1	1	1	2	2	2	2	2	2	1	1	4	2	2	1	1	2	4	1
67	1	141	2	1	15	1	5	1	1	300	1	1	2	1	2	2	2	2	2	2	2	2	3	1	1	1	1	2	4	1
68	1	90	2	1	20	1	5	1	2	400	1	1	1	1	2	2	2	2	2	2	1	2	1	2	1	2	1	2	4	1
69	2	300	1	1	15	1	2	1	2	300	1	1	1	1	1	2	2	2	1	1	1	1	2	2	1	1	1	1	3	1
70	4	750	1	3	30	1	5	1	1	500	2	3	2	2	2	2	1	1	1	2	1	1	2	2	1	2	1	2	2	1
71	1	60	2	1	15	1	5	1	1	200	2	1	1	1	2	2	2	2	2	2	1	2	3	2	1	1	1	1	4	1
72	1	227	1	2	20	1	5	1	2	250	1	1	1	1	2	2	2	2	2	2	2	2	2	1	2	2	2	2	3	1
73	1	145	2	2	15	1	5	3	2		2	1	1	2	2	2	2	2	2	2	2	2	1
74	1	37	2	1	20	1	5
75	1	69	2	1	25	1	5	1	2	300	1	1	1	1	1	2	2	2	2	2	1	2	3	2	1	1	1	2	4	1
76	1	60	2	1	20	1	5	1	1	80	2	1	1	2	2	2	2	2	2	2	2	2	2	1	1	1	1	2	4	2
77	1	21	2	1
78	1	51	2	1	15	1	5	1	1	100	2	1	1	1	2	2	2	1	2	2	2	1	1	2	2	1	1	2	3	2
79	2	460	1	2	15	1	5	1	4	900	1	1	1	2	2	1	2	1	2	2	1	2	4	2	1	2	2	1	3	1
80	2	123	2	2	15	1	5	3	2	294	2	1	1	1	1	1	2	2	2	2	1	1	3	1	1	1	2	1	3	1
81	1	109	2	1	20	1	5	1	1	250	2	1	2	1	1	2	2	2	1	2	1	1	3	1	2	1	1	1	3	1
82	1	126	2	1	25	1	5	1	1	200	2	2	1	1	2	2	2	2	2	2	1	2	2	2	1	1	1	1	3	1
83	2	182	1	1	15	1	1	1	3	300	2	1	1	1	2	1	2	2	1	2	1	2	3	2	1	1	2	2	3	1
84	2	74	2	2	20	1	5	1	1	380	2	1	1	1	1	1	2	2	2	2	1	2	3	2	2	2	2	1	3	1
85	2	106	2	1	15	3	3	1	1	600	2	1	1	1	2	1	2	1	1	2	1	1	3	2	1	1	1	1	3	1
86	4	630	1	1	35	1	1	1	2	350	2	2	2	2	2	1	2	2	1	2	1	2	4	2	1	2	1	2	3	1
87	1	24	1	1	25	6	6
88	1	44	2	1	15	1	5	1	1	130	2	2	1	1	1	2	2	2	1	2	2	2	3	2	2	2	2	1	3	1
89	1	91	2	2	15	1	5	1	2	150	1	1	1	1	2	1	2	2	2	2	1	1	1	2	2	1	2	2	3	1
90	4	650	1	1	30	1	5	1	2	100	2	2	1	2	2	1	2	2	1	2	1	1	3	2	2	2	2	2	1	1
91	1	20	2	2	20	3	5	1	1	50	1	1	1	2	2	2	2	2	2	2	1	2	3	2	2	1	2	1	3	1
92	2	235	1	1	15	1	5	1	2	400	2	1	1	1	2	2	2	2	2	2	2	2	3	2	2	2	2	1	2	1
93	2	223	2	1	20	1	5	1	2	100	2	3	1	1	1	1	2	2	2	2	1	1	2	2	1	2	2	1	3	1
94	1	150	2	1	15	1	5	1	1	160	1	2	1	1	2	1	2	2	2	2	1	2	4	2	1	1	2	2	3	2
95	1	125	2	2	15	1	5	1	1	200	2	1	1	1	1	2	2	2	1	1	1	1	4	2	1	1	1	1	4	1
96	1	82	2	1	25	1	5	1	1	30	1	1	2	1	2	2	2	2	2	2	2	1	3	2	2	1	2	2	4	1
97	4	1100	1	1	50	1	5	1	2	350	2	2	1	2	1	1	1	1	1	2	1	1	1	2	1	1	2	1	3	1
98	4	180	2	1	40	1	4	1	2	900	2	1	2	2	1	2	1	2	2	2	2	2	3	2	2	1	2	1	3	1
99	1	55	2	2	30	1	5	1	1	240	1	1	1	1	1	2	2	1	2	2	2	1	4	2	1	1	1	1	4	1
100	1	40	2	2	10	1	5	1	1	200	2	2	2	2	2	2	2	2	2	2	1	2	4	2	2	1	2	2	3	1
101	1	25	2	1	15	1	5	1	1	60	1	1	1	1	2	2	2	2	2	2	2	2	3	2	1	2	2	2	4	1
102	1	200	1	2	15	1	5	1	1	120	1	1	1	1	2	2	2	1	2	1	1	2	2	2	1	1	1	2	3	1
103	4	850	1	1	1	1	4	1	1	250	2	1	1	2	1	1	1	1	1	1	1	1	2	2	1	2	2	1	2	1
104	1	219	1	1	20	1	5	1	1	380	1	1	1	2	2	2	2	2	2	2	1	1	3	2	2	1	2	2	4	1
105	1	178	1	2	15	1	5	1	1	180	2	1	1	2	2	2	2	2	2	2	2	1	4	2	2	2	1	2	4	1
106	1	78	2	1	15	1	1	1	1	200	2	1	1	1	2	2	2	2	2	2	1	2	1	2	1	1	1	2	3	1
107	1	63	2	1	15	1	5	1	1	150	2	2	1	2	1	1	2	2	2	2	2	2	3	2	1	1	1	1	3	1
108	1	60	2	2	25	1	5	1	1	100	2	1	1	1	1	2	2	1	2	2	1	1	4	2	1	2	2	2	4	1
109	2	460	1	2	20	1	5	1	2	300	2	2	1	1	1	1	2	2	2	2	1	1	1	1	1	1	2	1	2	1
110	1	78	1	1	20	1	5	1	1	120	2	1	1	1	2	2	2	2	2	1	1	2	3	2	1	1	1	2	4	1
111	3	900	1	1	10	1	5	3	3	400	2	1	1	1	2	1	2	2	2	2	1	2	3	2	1	2	2	1	3	1
112	2	66	2	1	15	1	5	1	1	230	2	2	2	1	1	2	2	2	2	2	2	2	1	1	1	2	2	2	2	1
113	4	900	1	1	15	1	5	1	2	200	1	3	1	2	2	2	2	2	2	2	2	2	3	2	1	2	2	2	2	1
114	4	900	1	1	15	1	5	1	2	200	1	2	2	2	2	2	2	1	2	2	2	2	2	2	1	2	2	2	2	1
115	1	29	2	1	30	1	5	1	1	250	2	1	1	1	2	2	2	2	2	1	1	2	4	2	1	1	1	1	4	1
116	1	78	2	1	15	1	1	1	1	400	2	1	1	1	2	2	2	1	2	2	1	2	2	2	1	2	1	2	3	1
117	1	90	2	1	20	1	5	1	1	250	1	1	1	1	1	1	2	1	2	2	1	2	2	2	1	1	1	1	4	1
118	1	306	1	1	15	1	5	1	3	600	1	1	1	1	2	2	2	2	2	2	2	2	1	2	1	1	1	2	4	1
119	1	140	2	1	15	1	5	1	1	250	2	1	1	1	1	2	2	1	2	2	2	2	2	1	1	1	1	2	4	1
120	1	82	2	1	15	1	5	1	1	200	1	1	1	1	2	2	2	2	2	2	1	2	3	2	2	2	1	2	3	1
121	4	800	1	1	35	1	5	1	2	350	2	3	2	2	2	1	2	2	1	2	1	1	4	1	1	2	2	2	3	1
122	3	530	1	1	15	1	5	3	2	450	2	1	1	2	1	1	2	2	1	2	1	1	3	1	1	1	1	1	3	1
123	3	920	1	1	10	1	6	1	2	408	2	2	2	2	1	1	2	2	1	2	1	1	2	2	1	1	2	1	2	1
124	3	914	1	1	10	1	5	3	3		2	1	1	1	2	1	2	2	2	2	2	2	2
125	3	550	2	1	15	1	5	1	3	530	2	1	1	2	2	1	2	2	2	2	1	1	1	2	1	1	2	1	3	1
126	3	914	1	1	10	1	5	3	3	350	2	1	1	1	2	1	2	2	2	2	2	2	2	2	1	2	2	1	4	1
127	3	700	2	1	10	1	5	1	2	600	1	3	2	2	2	1	2	1	1	2	1	2	2	1	1	2	2	1	3	1
128	3	525	2	1	10	6	5	1	2	445	2	2	1	2	1	1	2	1	1	2	1	1	3	1	1	2	1	1	4	1
129	3	1100	2	1	10	1	5	1	5	400	1	1	1	1	1	1	1	1	1	2	1	1	1	1	1	1	2	1	4	1
130	3	978	2	1	10	1	4	1	5	260	1	1	1	2	1	1	1	1	1	2	1	1	1	2	1	1	2	1	3	1
