# Supplementary material for: Policies and opportunities for physical activity engagement in Austrian schools: a census survey
Source: PeerJ. 2024 Aug 13;12:e17794. doi: 10.7717/peerj.17794 (PMC11328834; doi:10.7717/peerj.17794)
Supplement: Supplemental Information 2 — The legend provides definitions for each item of the raw data to enable a better understanding and verification of the results. [file peerj-12-17794-s002.xlsx]

## Sheet: Tabelle1
type of schools			environment			teachers´education			cancellation of PE classes			participation in PE lessons
primary school	1		urban	1		qualified teachers	1		0-20%	1		0-20%	1
middle school	2		rural	2		party- qualified teachers	2		20-40%	2		20-40%	2
high school	3					non-qualified teachers	3		40-60%	3		40-60%	3
vocational high school	4								60-80%	4		60-80%	4
									80-100%	5		80-100%	5
									i don´t know	6		i don´t know	6
gymnastic hall			swimming hall			school yard			meadow area			playground
yes, own gh	1		yes	1		yes	1		yes	1		yes	1
yes, rented, but sole use	2		no	2		yes but smaller than 4m2/ student	2		no	2		no	2
yes, rented and shared use	3					no	3
no	4
table tennis			athletics facility			gym			climbing wall			beachvolley court
yes	1		yes	1		yes	1		yes	1		yes	1
no	2		no	2		no	2		no	2		no	2
skate park			sports field			basket ball hoops						satisfaction with PA facilities
yes	1		yes	1		yes	1					very dissatisfied	1
no	2		no	2		no	2					rather dissatisfied	2
												rather satisief	3
												very satisfied	4
fitness tests			participation in sports events			cooporation with sports clubs			PA promotion projects			extracurricular PA programs
yes	1		yes	1		yes	1		yes	1		yes	1
no	2		no	2		no	2		no	2		no	2
satisfaction with activity friendliness			wish for professional support in PA promotion
strongly disagree	1		yes	1
tend to disagree	2		no	2
agree somewhat	3
agree completely	4
